1 **Pooled functional genomic screens for intracellular calcium effectors**

2 Anjali Rao<sup>1</sup> and Joel M. Kralj<sup>1,2</sup>

3

4 <sup>1</sup> BioFrontiers Institute, and Molecular Cellular and Developmental Biology,

5 University of Colorado - Boulder, CO 80303

6 <sup>2</sup> Corresponding Author

7 **Keywords:** Functional genomics, CaMPARI, calcium, histamine, desensitization

8

9 **Abstract:**

10 Cytoplasmic calcium transients relay cellular signals on timescales from milliseconds to hours,  
11 and the dynamic nature of calcium signals has slowed functional genomic screening for cellular  
12 calcium effectors. Here, we present a new strategy to identify calcium handling genes via a pooled  
13 knockdown employing the calcium-sensitive photo-switchable fluorescent protein, CaMPARI.  
14 This assay, cal-Seq, enabled identification of regulators for both cellular desensitization and  
15 histamine induced calcium signaling including GPR99, a leukotriene binding receptor, with  
16 implications in asthma treatment.

17

18

19 Calcium is a critical second messenger, and intracellular calcium levels are precisely  
20 controlled by numerous cellular effectors<sup>1</sup>. Basal cytoplasmic calcium levels are low, but can be  
21 increased within milliseconds to modulate cellular behavior. Calcium dynamics encode cellular  
22 signals through modulation of amplitude, frequency, and spatial location of the concentration flux,  
23 and numerous diseases are linked to mutations in calcium handling proteins<sup>2</sup>. Despite this critical  
24 importance, the transient nature of cytoplasmic calcium has slowed discovery of calcium effectors  
25 due to the difficulties of screening transients at genomic scales.

26 Genome-wide screens (GWS) employing pooled shRNA and CRISPR technologies are  
27 powerful tools for gene function discovery<sup>3</sup>. However, current technology limits pooled screens  
28 to probing slow physiological processes like cell survival, proliferation, or gene expression. Rapid  
29 cellular changes, like calcium transients, are too short-lived to screen and sort entire libraries, and  
30 require imaging-based screens of individual genes in an arrayed format<sup>4,5</sup>. However, arrayed  
31 screens require long experiment times and the use of expensive robotic liquid handling and  
32 imaging. Conversely, pooled genomic screens can be economical and fast.

33 In this paper, we developed a new strategy to profile calcium handling genes in a pooled  
34 format using CaMPARI, a unique, genetically encoded, fluorescent calcium sensor<sup>6</sup>. CaMPARI  
35 photoconverts from green to red fluorescence only in the presence of both Ca<sup>++</sup> and 405 nm light.  
36 The irreversible photoconversion acts as a mechanism to “lock-in” the magnitude of the calcium  
37 signal (red to green fluorescence ratio) at a specific, user defined instant in time. The calcium  
38 concentration can be measured post hoc with a microscope or Fluorescence Activated Cell Sorting  
39 (FACS) machine. We coupled CaMPARI with the scalability of pooled genome-wide knockdown  
40 libraries to develop a new functional, high-through assay to rapidly map genes that regulate  
41 intracellular calcium levels (Fig. 1A). The protocol started with a pool of isogenic, CaMPARI

42 expressing cells treated with lentivirus containing a pooled knockdown library. Chemical  
43 stimulation triggered calcium influx, followed by exposure to 405 nm light to photoconvert cells  
44 with high cytoplasmic calcium from green to red fluorescence. All cells are exposed to identical  
45 chemical conditions, and the number of measured cells is > 100x library coverage, both of which  
46 help minimize the effects of population heterogeneity. Green cells (low calcium) are sorted via  
47 FACS, and the associated genetic perturbation (shRNA) sequences are read via the Illumina  
48 platform. Genes enriched among green cells are then identified by computational analyses, and  
49 top hits and pathways are validated individually. The entire screen, which we termed cal-Seq, can  
50 be performed in triplicate in 4 weeks using instruments available to most researchers.

51 As proof of concept, we used this assay to identify genes essential for histamine-induced  
52 calcium in HeLa cells. CaMPARI acted as both a photoswitchable and real-time calcium indicator  
53 upon histamine stimulation, as previously reported<sup>6</sup> (Fig 1B, S1). Fluorescence cytometry  
54 experiments measured a photoswitch  $K_d$  of 124 nM  $Ca^{++}$  (Fig 1B, S2), similar to imaging  
55 measurements<sup>6</sup>. The histamine induced calcium combined with 405 nm light (40 seconds) showed  
56 a green to red fluorescence conversion as indicated by cytometry (Fig 1C and S2). Addition of a  
57 pooled lentiviral library (TRC1/1.5 shRNA<sup>7</sup>) increased the fraction of green cells (low calcium)  
58 ~9% as compared to scrambled shRNA infected cells (Fig.1D). This population of green cells was  
59 sorted via FACS, the associated shRNAs were identified using the NextSeq platform (Fig S3), and  
60 enrichment was quantified from 3 biological replicates with DeSeq<sup>8</sup>.

61 DeSeq analysis identified 348 shRNAs enriched in the green population (p-adjusted < .05,  
62 Fig 1E, Table S1). We selected 23 hits with GO terms related to calcium handling to individually  
63 knock down in CaMPARI-expressing HeLa cells. Measured via cytometry, 29% significantly  
64 increased the fraction of green cells (Fig. S4). We attributed this low significance to low signal-

65 to-noise ratio (SNR) CaMPARI cytometry measurements, as well as common issues with  
66 functional genomic screens<sup>9</sup>. These gene knockdowns were also measured with Twitch2B<sup>10</sup>, a  
67 real time, ratiometric calcium indicator. Using this assay, 65% of knockdowns showed  
68 significantly reduced calcium influx compared to a sham knockdown. Hence, cal-Seq was  
69 successful in identifying genes important for calcium handling.

70       Among the top hits were several expected genes and pathways. Pathway analysis revealed  
71 known regulators of InsP3R, an essential downstream component of histamine signaling, including  
72 isoforms of PKC (PRKCA, PRKCQ), PKA (PRKAR1a, PRKX), CamK2A, and Fyn<sup>11</sup> (Fig S4,  
73 S5), as well as regulators of inositol-3-phosphate (ITPKC, PIP5K1B, SKIP, PIK3AP1, PIK3R1).  
74 Gβγ and Gαi signaling pathways were enriched, as well as mediators of NFAT/calcineurin  
75 signaling<sup>12</sup>. PPIF, a calcineurin inhibitor, and proteins known to be involved in axonal guidance  
76 like EphA10, Slit1, and Sema4F also appeared. These proteins are known to affect calcium  
77 signaling<sup>13</sup>, and are involved in inflammation<sup>14</sup>, a key function of histamine. Surprisingly, H1R  
78 was not a hit. Only a single shRNA (TRC-62) modestly reduced H1R expression and CaMPARI  
79 photoconversion (Fig S6) in our hands. However, chemical inhibition of H1R and PKC  
80 significantly increased the percent of green cells (Supp Fig 6). These data highlight the need for  
81 new sensors optimized for FACS screening to improve the SNR of the cal-Seq data.

82       GPR99 (OXGR1), a GPCR receptor that is proposed to act as a leukotriene receptor,  
83 appeared as one of the top hits, significantly decreased calcium in both cytometry and real-time  
84 measurements, and was investigated further due to a reported role in allergic inflammation<sup>15,16</sup>.  
85 HeLa cells infected with GPR99 shRNA showed a 3-fold decrease in GPR99 protein levels as  
86 compared to the wild type (Fig S7). Cytometry and real time measurements showed decreased  
87 histamine induced calcium transients as compared to a sham (Fig 2A,B). Over-expression of

88 GPR99 using a plasmid ORF in the knock-down cells did not rescue this phenotype (Fig S7). The  
89 ORF over-expressed protein ran at lower molecular weight than the mature protein at 55 kDa  
90 which is thought to be glycosylated<sup>17</sup>. It is likely the exogenously expressed protein is trapped in  
91 the endoplasmic reticulum instead of getting glycosylated and transported to the plasma  
92 membrane.

93 Leukotriene E4 (Lte4) has been proposed as the ligand for GPR99 based on *in vitro* and  
94 knock-out mouse studies<sup>15,16</sup>. Addition of Lte4 to HeLa cells increased cytosolic calcium  
95 concentrations dependent on GPR99 expression (Fig. 2C). In WT cells, pretreatment with Lte4  
96 caused an increased calcium response to histamine stimulation that was dependent on the presence  
97 of GPR99 (Fig 2D and S8). We further investigated the relationship between GPR99 and  
98 histamine signaling in Beas2B cells, a widely used epithelial cell line for modeling upper  
99 respiratory tract infections in asthma<sup>19</sup>. Similar to HeLa cells, Beas2B cells showed both histamine  
100 and Lte4 induced calcium currents (Figs 2E-G, S9). GPR99 knockdown reduced histamine  
101 induced flux and eliminated the Lte4 response. Furthermore, the presence of excess Lte4 increased  
102 the histamine induced calcium response. These data show synergy between histamine and Lte4 in  
103 epithelial cells and provide molecular context to similar observations in embryonic cancer cells<sup>18</sup>.  
104 In the past, synergism between drugs targeting leukotriene receptors and histamine receptors has  
105 been proposed based on observations from clinical trials in asthmatic patients<sup>20</sup> indicating cross-  
106 talk between these two pathways. Current drugs on the market target cysLTR1 which have low  
107 affinity towards Lte4, a proposed biomarker for allergic inflammation like asthma<sup>21</sup>. GPR99 has  
108 higher affinity towards Lte4<sup>15</sup>, and hence, targeting GPR99 might have additional benefits for  
109 patients with pathological inflammatory conditions.

110 To extend the potential utility of cal-Seq, we leveraged the timing control between  
111 chemical stimulation and lock-in light pulse to identify effectors of receptor desensitization. Cells  
112 exposed to the same stimulus reduce their response from numerous cellular factors including  
113 arrestins, endocytosis, and ubiquitination<sup>22</sup>. We applied a stimulation protocol similar to previous  
114 reports known to induce homogenous histamine desensitization in HeLa cells<sup>23</sup> (Fig 3A, S10).  
115 Repeated histamine stimulation for 5 minutes followed by washout resulted in an increased  
116 fraction of green (desensitized) cells as compared to the initial exposure indicative of  
117 desensitization (Fig 3B,C). TRC1 lentivirus application increased the fraction of red cells as  
118 compared to a sham knockdown (Fig 3D). The red pool was sorted, sequenced, and analyzed for  
119 differential expression in triplicate. DeSeq analysis yielded 140 shRNA clones significantly  
120 enriched (p-adjusted < 0.1) in the red fraction, which is lower than the number of hits identified  
121 from histamine stimulation (Fig 3E, Table S2). The lower number of significant genes is likely  
122 due to a higher background of red cells before library knockdown which increased noise. Despite  
123 the decreased SNR, genes previously associated with desensitization were enriched in the red  
124 population including arrestins, endocytic regulators, and ubiquitin modifiers and suggested our  
125 screen identified relevant proteins (Fig S11). Real-time imaging confirmed a decreased  
126 desensitization in knockdowns of ARRDC4 and TOM1L2 compared to a sham knockdown (Fig  
127 S10). Future work will investigate specific genes found on our list and how they mediate  
128 desensitization.

129 In conclusion, we believe that cal-Seq can be used to better understand the cellular  
130 components giving rise to transient calcium signals in mammalian cells. Our screen identified  
131 genes essential for histamine-induced calcium influx and histamine induced desensitization in  
132 HeLa cells. Published CaMPARI mutants with variable  $K_d$  are available<sup>6</sup> will enable fine tuning

133 of dynamic range for a variety of experiments in different cell types or organelles. Improved  
134 CaMPARI mutants with higher sensitivity, or non-fluorescent calcium integrators, can further  
135 improve the sensitivity of this screen. We envision long-term use of this technique to identify  
136 potential genes to target with small molecules in disorders with disrupted calcium homeostasis like  
137 Alzheimer's disease, ALS, cardiac conditions and aging.

138



## 139 **Methods**

140 **Plasmids:** A gBlock containing CaMPARI (pcDNA3-CaMPARI was a gift from Loren Looger  
141 (Addgene plasmid # 60421)) fused with P2A peptide followed by a blasticidin cassette was  
142 obtained from Integrated DNA Technologies, Inc. (Coralville, IA). This gBlock was cloned into  
143 PmeI and SmaI restriction sites of pWPXL plasmid (pWPXL was a gift from Didier Trono  
144 (Addgene plasmid # 12257)) via Gibson cloning. pHuji (pBAD-pHuji was a gift from Robert  
145 Campbell (Addgene plasmid # 61555)) was cloned into pLentiCMV plasmid (pLenti-CMV-MCS-  
146 GFP-SV-puro was a gift from Paul Odgren (Addgene plasmid # 73582)) using BamHI/SalI via  
147 Gibson cloning. Twitch-2B (Twitch-2B pRSETB was a gift from Oliver Griesbeck (Addgene  
148 plasmid # 48203)) was cloned into BamHI and EcoRI of pWPXL using restriction digestion and  
149 ligation. H2B in a lentiviral plasmid was a gift from the Spencer lab. Human TRC1/1.5 shRNA  
150 library (~100,000 shRNAs), individual shRNAs for the hits in the screen, and open reading frame  
151 (ORF) plasmid for GPR99 were obtained from Functional Genomic Facility, University of  
152 Colorado, Denver.

153 **Cells:** HeLa cells were obtained from ATCC (Manassas, VA), and maintained in DMEM, 10%  
154 fetal bovine serum, 2mM L-glutamine, and 500µg/ml penicillin-streptomycin (Thermo Fisher  
155 Scientific, Waltham, MA) at 37 °C. Lenti-X 293T cells for lentivirus production were obtained  
156 from Clontech (Mountain View, CA), and grown in DMEM10 medium supplemented with 1mM  
157 sodium pyruvate and 25mM HEPES (pH 7). Beas2B cells were purchased from ATCC (Manassas,  
158 VA), and maintained in LHC-9 media (Thermo Fisher Scientific, Waltham, MA).

159 **Lentivirus production:** 60-70% confluent 293T cells in 15 cm cell culture dishes were transfected  
160 with 15 µg pΔ8.9, 7 µg VsVg, and 11 µg gene of interest using polyethylenimine. Media was

161 changed after 4 hours. Virus particles were harvested from the supernatant 48 hours post-  
162 transfection, and filtered through 0.45  $\mu\text{m}$  filter, and stored at  $-80^{\circ}\text{C}$ . These viral suspensions were  
163 then added directly to cells in 3.5 mm dishes ( $\sim 1$  mL of supernatant), and incubated for 12 hours.  
164 Viral preps derived from this method gave us about 90-95% infection efficiency in HeLa cells with  
165 no apparent cell death. Antibiotic treatment (3  $\mu\text{g}/\text{ml}$  Puromycin (2 days) or 5  $\mu\text{g}/\text{ml}$  Blastacidin  
166 (7 days)) was started 48 hours post-infection. The cells were allowed to recover in antibiotic-free  
167 media for a minimum of 12 hours before experiments were performed.

168 **Photoconversion and cell sorting:** HeLa cells were washed and covered with HBSS/20 mM  
169 MOPS. Cells were placed in a custom built LED lightbox capable of emitting 405 nm light at 400  
170  $\text{mW}/\text{cm}^2$ . The lightbox used 54 405 nm LEDs arrayed inside a reflective chamber  
171 (LEDSupply.com, #A008-UV400-65).

172 For direct stimulation of histamine treated cells, histamine (Sigma Aldrich, St. Louis, MO) at  
173 appropriate concentration was added onto the cells, and the 405nm light was turned on  
174 immediately for 40 seconds. Post-photoconversion the cells were trypsinized and suspended in  
175 HBSS/MOPS buffer supplemented with 10 mM EGTA. Subsequently, cells were sorted on the  
176 BD FACSAria Fusion (BD Biosciences, San Jose, CA) using 488 and 561 nm lasers. Sorted cells  
177 were collected in media, and spun at  $400 \times g$ . Genomic DNA was extracted from the cells using  
178 the DNeasy Blood and Tissue Kit (Qiagen, Valencia, CA). Genomic DNA was measured using  
179 the NanoDrop.

180 For the desensitization experiments, histamine was added at 10  $\mu\text{M}$  and left to incubate for 5  
181 minutes. After 5 minutes, all the medium was replaced by histamine free medium for an additional  
182 5 minutes. This process was repeated 3 times. On the third application of histamine, a 405 nm

183 lock in pulse was delivered for 40 seconds, 2.5 minutes after histamine addition. Trypsinization  
184 and sorting were identical to the previous experiments.

185 **Library prep and deep Sequencing:** Our library preparation strategy was similar to a previously  
186 published study<sup>24</sup>. Briefly, shRNA cassette was isolated from genomic DNA via PCR. 12 PCR  
187 reactions with 600 ng genomic DNA template per reaction were used to get a 10-fold coverage of  
188 the unsorted library. The resulting PCR product was digested with XhoI to recover a single strand  
189 of shRNA. Barcodes were ligated to the XhoI-digested fragments, and a second round of PCR was  
190 performed to include the Illumina adaptor sequences. Resulting products were gel purified, and  
191 several quality control tests for the library were done using Bioanalyzer assay, Qubit, and qPCR.  
192 Barcodes allowed multiplexing of samples, and pooled samples were loaded at 5 pM (30% PhiX  
193 was spiked in) and sequenced on a NextSeq 500 at the Sequencing core facility at Biofrontiers  
194 Institute, University of Colorado, Boulder. Sequencing was performed at 500X depth. We obtained  
195 340 million reads, and 95% of these reads were > Q30.

196 **Sequencing data analysis:** The quality of the reads was assessed using the FastQC program run  
197 using a Linux interface (Supp Fig. 4). Data preprocessing was performed using the FASTX toolkit.  
198 Demultiplexing was performed using FASTX Barcode Splitter, and low quality reads were  
199 discarded using the FASTQ Quality Filter. Pre-processed reads were mapped to the shRNA library  
200 using the Bowtie aligner. Around 94% of the shRNA clones in the library were detected in our  
201 reads suggesting good coverage. Differential reads between our unsorted and sorted samples were  
202 estimated using DESeq analysis<sup>8</sup> in R. Pathway analysis was performed with the Ingenuity  
203 Pathway Analysis software package (Thermo-Fischer) by using genes with a p-adjusted value <  
204 0.05.

205 **RNA analysis:** RNA was extracted from cultured cells using Trizol (Life technologies). Total  
206 RNA was treated with Turbo DNase (Life technologies) followed by phenol/chloroform  
207 extraction. 500 ng of RNA was reverse transcribed using random hexamers.

208 **Western Blot analysis:** Western blots were used to measure the protein concentration of GPR99  
209 in both HeLa and Beas2b cells. Cells were infected with a sham shRNA or a shRNA targeting  
210 GPR99, selected with puromycin and incubated for 2 days. Cells were disrupted using RIPA lysis  
211 buffer (Thermo-Fischer, #89900) according to the manufacturers directions. 10 µg protein was  
212 loaded into each lane of a NuPage 4-12% gel (Thermo-Fischer, #NP0323BOX). Protein was  
213 transferred onto a PVDF filter (Thermo-Fischer, #LC2005) and blocking was achieved with 5%  
214 BSA for 1 hour at 4 °C. A primary antibody for GPR99 (Abcam, #ab140630) or beta-tubulin was  
215 soaked for 2 hours at 4 °C at a dilution of 1:1000. HRP secondary antibodies were used to generate  
216 contrast. Quantification was performed in ImageJ (NIH).

217 **Imaging:** Live cell imaging (room temperature) of HeLa cells expressing lentivirus-based  
218 Twitch-2B and H2B was carried out using a Nikon Spinning Disc Confocal microscope at the  
219 BioFrontiers Advanced Light Microscopy Core, University of Colorado, Boulder. Cells were  
220 imaged on tissue culture plastic and drug additions were pipetted during data acquisition. Cells  
221 were imaged with a 20X, NA 0.5 objective onto an EMCCD (Ultra888, Andor). Cells were  
222 illuminated with 445 nm and 515 nm lasers to excite the CFP and YFP fluorophores on Twitch,  
223 respectively. Movies were acquired by taking a 100 ms frame every 2 seconds, with the  
224 illumination sources off during the wait. Image segmentation was achieved by using the BFP  
225 H2B mark after the histamine stimulation. The cytoplasmic signal was generated by extending a  
226 ring of 5 pixels around the nucleus and averaging across those pixels to obtain an intensity for  
227 each cell. Intensities were then extracted for each cell, and the entire cell population was used to

228 calculate the mean and standard deviation. The calcium AUC was measured by integrating using  
229 the trapezoidal rule from the histamine addition for 40 seconds to mimic the photoconversion.  
230 All image analysis scripts were custom written in Matlab R2017a, and all scripts will be made  
231 available to researchers upon request.

232

233 Acknowledgements:

234 We thank Ben Dodd for his inspiration for this project, and Giancarlo Bruni, Andrew Weekley,  
235 Humza Ashraf, and Ellis Aune for discussions and help. We thank the BioFrontiers sequencing  
236 core at CU-Boulder. Libraries and shRNA clones were acquired from the functional genomics  
237 core at CU-Anschutz. Spinning disk confocal imaging was performed at the BioFrontiers  
238 Advanced Imaging Core supported by HHMI. FACS sorter and analyzer are supported by  
239 S10OD021601. This work was supported by the Searle Family Foundation (J.M.K) and the  
240 NIGMS (DP2GM123458, J.M.K).

241 Competing Interests: The authors have filed a provisional patent for cal-Seq.

242 References (20):

- 243 1. Clapham, D. E. Calcium signaling. *Cell* **131**, 1047–58 (2007).
- 244 2. Missiaen, L. *et al.* Abnormal intracellular Ca<sup>2+</sup>-homeostasis and disease. *Cell Calcium* **28**,  
245 1–21 (2000).
- 246 3. Morgens, D. W., Deans, R. M., Li, A. & Bassik, M. C. Systematic comparison of  
247 CRISPR/Cas9 and RNAi screens for essential genes. *Nat. Biotechnol.* **34**, 634–636 (2016).
- 248 4. Sharma, S. *et al.* An siRNA screen for NFAT activation identifies septins as coordinators  
249 of store-operated Ca<sup>2+</sup> entry. *Nature* **499**, 238–242 (2013).
- 250 5. Schmunk, G. *et al.* High-throughput screen detects calcium signaling dysfunction in  
251 typical sporadic autism spectrum disorder. *Sci. Rep.* **7**, 40740 (2017).
- 252 6. Fosque, B. F. *et al.* Labeling of active neural circuits in vivo with designed calcium  
253 integrators. *Science (80-. )*. **347**, 755–760 (2015).
- 254 7. Root, D. E., Hacohen, N., Hahn, W. C., Lander, E. S. & Sabatini, D. M. Genome-scale  
255 loss-of-function screening with a lentiviral RNAi library. *Nat. Methods* **3**, 715–719  
256 (2006).
- 257 8. Anders, S. & Huber, W. Differential expression analysis for sequence count data. *Genome*  
258 *Biol.* **11**, R106 (2010).
- 259 9. Hart, T., Brown, K. R., Sircoulomb, F., Rottapel, R. & Moffat, J. Measuring error rates in  
260 genomic perturbation screens: gold standards for human functional genomics. *Mol. Syst.*  
261 *Biol.* **10**, 733 (2014).

- 262 10. Thestrup, T. *et al.* Optimized ratiometric calcium sensors for functional in vivo imaging of  
263 neurons and T lymphocytes. *Nat. Methods* **11**, 175–82 (2014).
- 264 11. Foskett, J. K., White, C., Cheung, K.-H. & Mak, D.-O. D. Inositol trisphosphate receptor  
265 Ca<sup>2+</sup> release channels. *Physiol. Rev.* **87**, 593–658 (2007).
- 266 12. Hogan, P. G., Chen, L., Nardone, J. & Rao, A. Transcriptional regulation by calcium,  
267 calcineurin, and NFAT. *Genes Dev.* **17**, 2205–32 (2003).
- 268 13. Sutherland, D. J., Pujic, Z. & Goodhill, G. J. Calcium signaling in axon guidance. *Trends*  
269 *Neurosci.* **37**, 424–432 (2014).
- 270 14. Mirakaj, V. & Rosenberger, P. Immunomodulatory Functions of Neuronal Guidance  
271 Proteins. *Trends Immunol.* **38**, 444–456 (2017).
- 272 15. Kanaoka, Y., Maekawa, A. & Austen, K. F. Identification of GPR99 Protein as a Potential  
273 Third Cysteinyl Leukotriene Receptor with a Preference for Leukotriene E<sub>4</sub> Ligand. *J.*  
274 *Biol. Chem.* **288**, 10967–10972 (2013).
- 275 16. Bankova, L. G. *et al.* Leukotriene E<sub>4</sub> elicits respiratory epithelial cell mucin release  
276 through the G-protein-coupled receptor, GPR99. *Proc. Natl. Acad. Sci.* **113**, 6242–6247  
277 (2016).
- 278 17. Wittenberger, T. *et al.* GPR99, a new G protein-coupled receptor with homology to a new  
279 subgroup of nucleotide receptors. *BMC Genomics* **3**, 17 (2002).
- 280 18. Bloemers, S. M. *et al.* Sensitization of the histamine H1 receptor by increased ligand  
281 affinity. *J. Biol. Chem.* **273**, 2249–55 (1998).



- 282 19. Xatzipsalti, M. & Papadopoulos, N. G. Cellular and animals models for rhinovirus  
283 infection in asthma. *Contrib. Microbiol.* **14**, 33–41 (2007).
- 284 20. Bartho, L. & Benko, R. Should antihistamines be re-considered as antiasthmatic drugs as  
285 adjuvants to anti-leukotrienes? *Eur. J. Pharmacol.* **701**, 181–4 (2013).
- 286 21. Austen, K. F., Maekawa, A., Kanaoka, Y. & Boyce, J. A. The leukotriene E4 puzzle:  
287 Finding the missing pieces and revealing the pathobiologic implications. *J. Allergy Clin.*  
288 *Immunol.* **124**, 406–414 (2009).
- 289 22. Freedman, N. J. & Lefkowitz, R. J. Desensitization of G protein-coupled receptors. *Recent*  
290 *Prog. Horm. Res.* **51**, 319-51–3 (1996).
- 291 23. Smit, M. J. *et al.* Short-term desensitization of the histamine H1 receptor in human HeLa  
292 cells: involvement of protein kinase C dependent and independent pathways. *Br. J.*  
293 *Pharmacol.* **107**, 448–55 (1992).
- 294 24. Sullivan, K. D. *et al.* Trisomy 21 consistently activates the interferon response. *Elife* **5**,  
295 e16220 (2016).

296

297

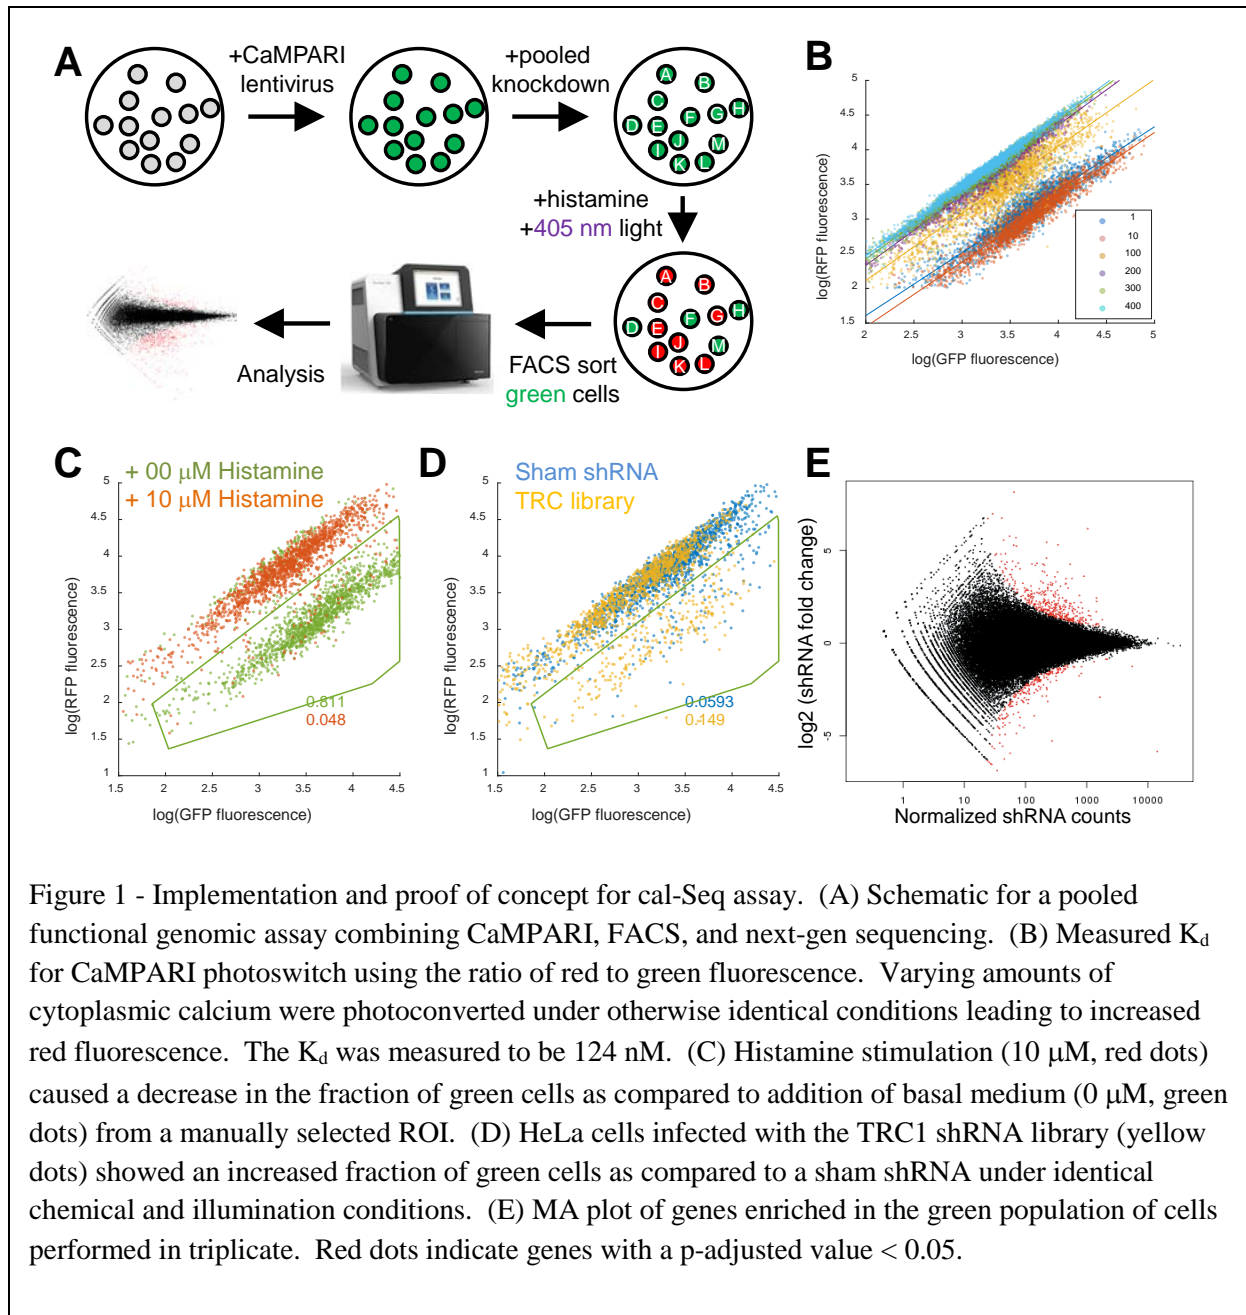

298

299

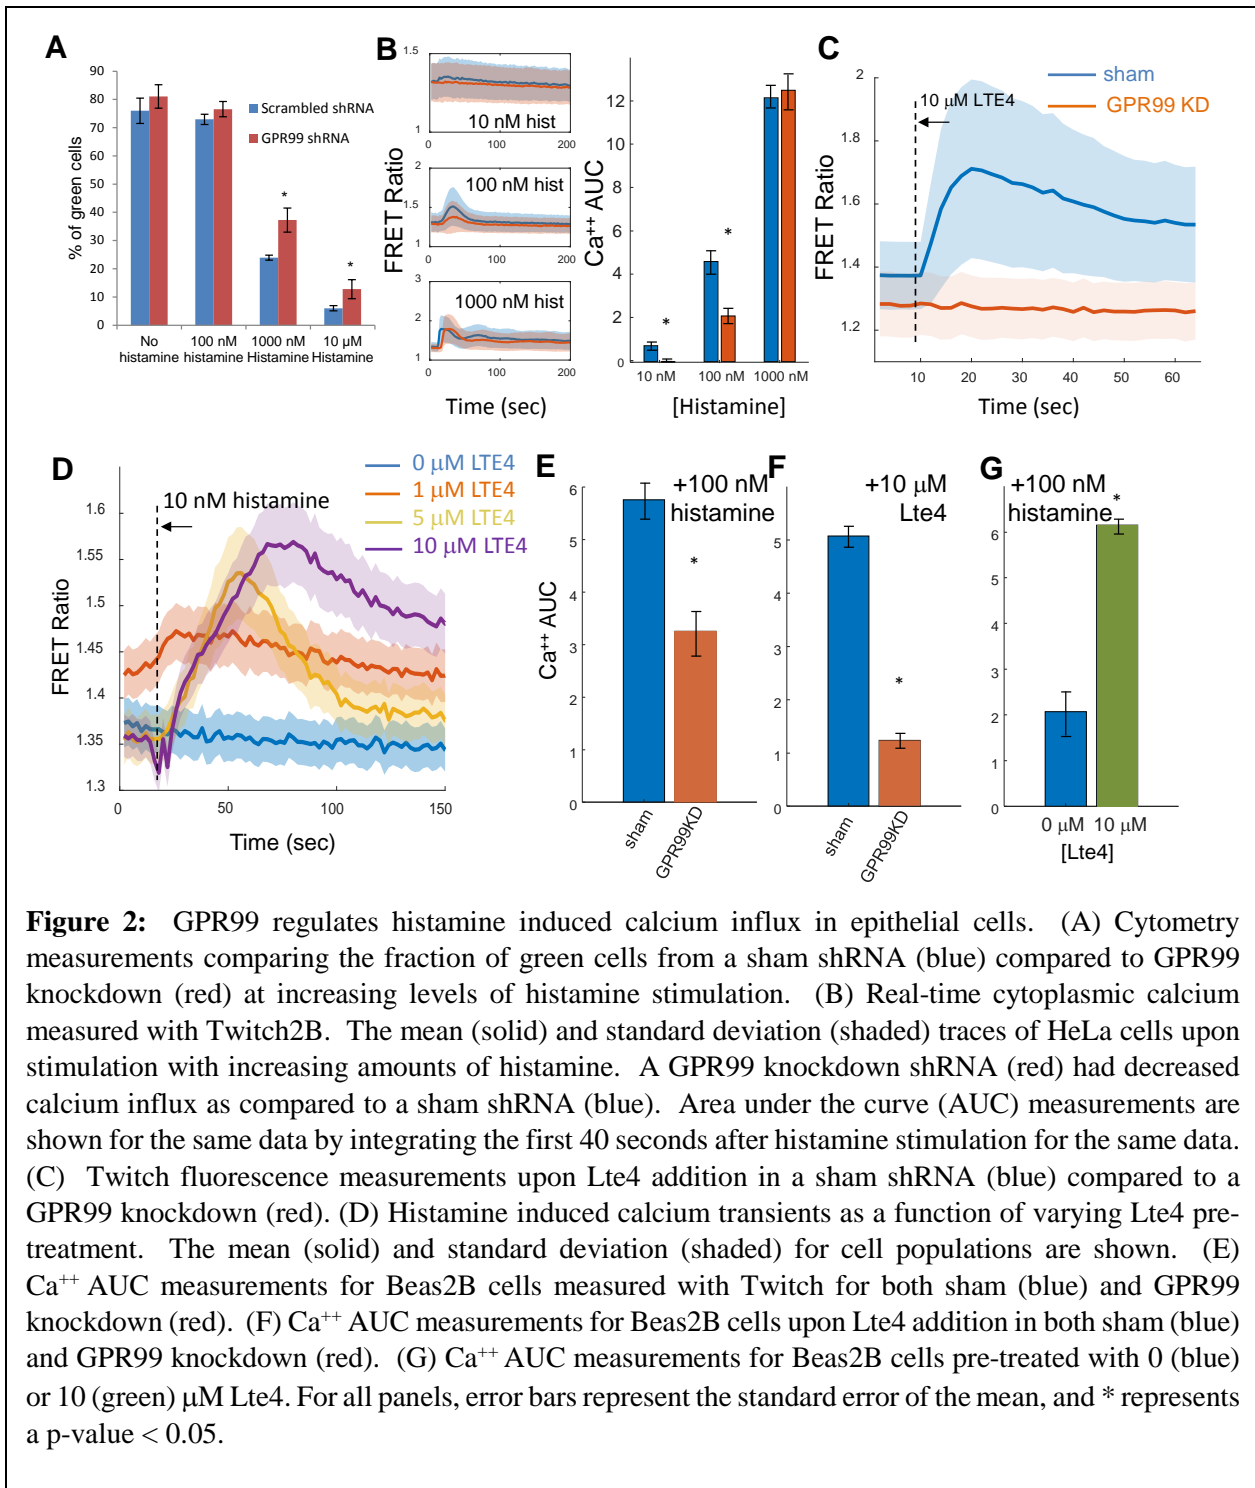

300

301

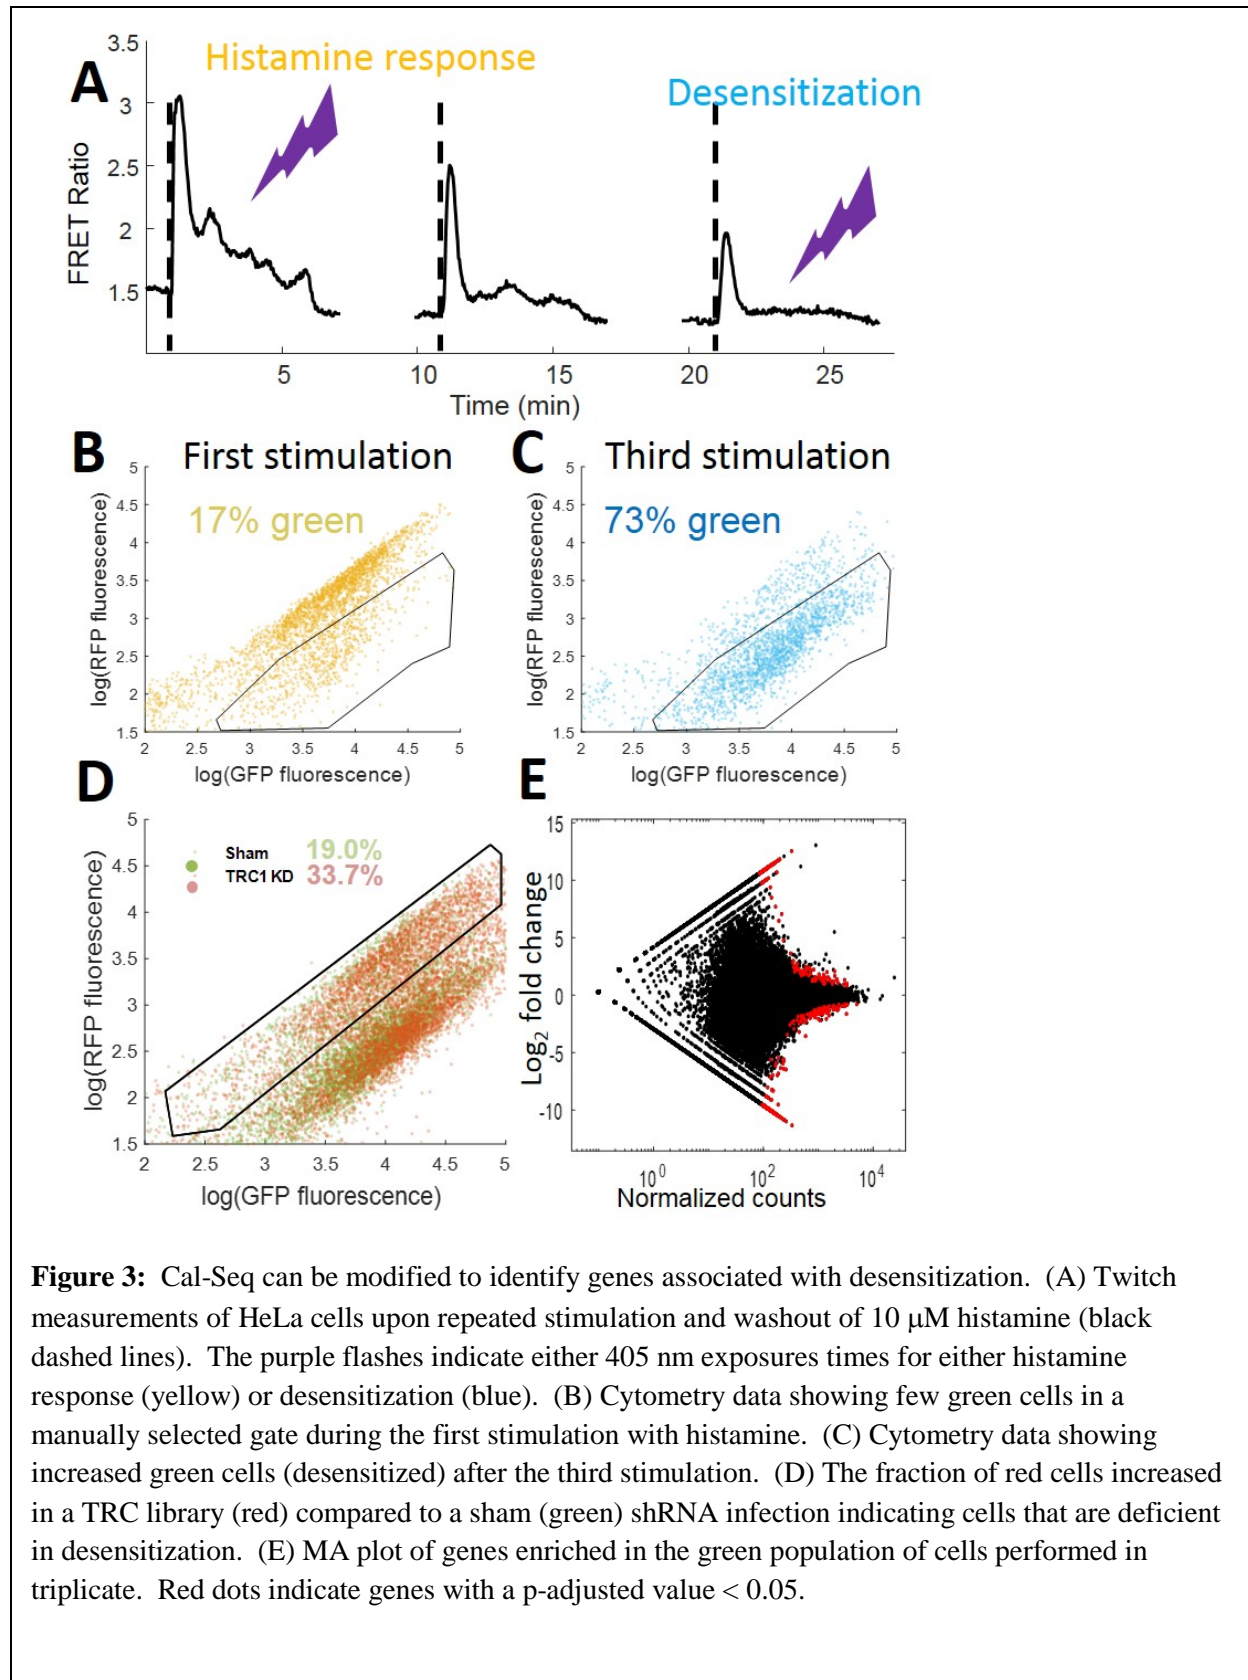

303

304 **Supplementary Figures:**

305 **Supplementary Figure 1:**

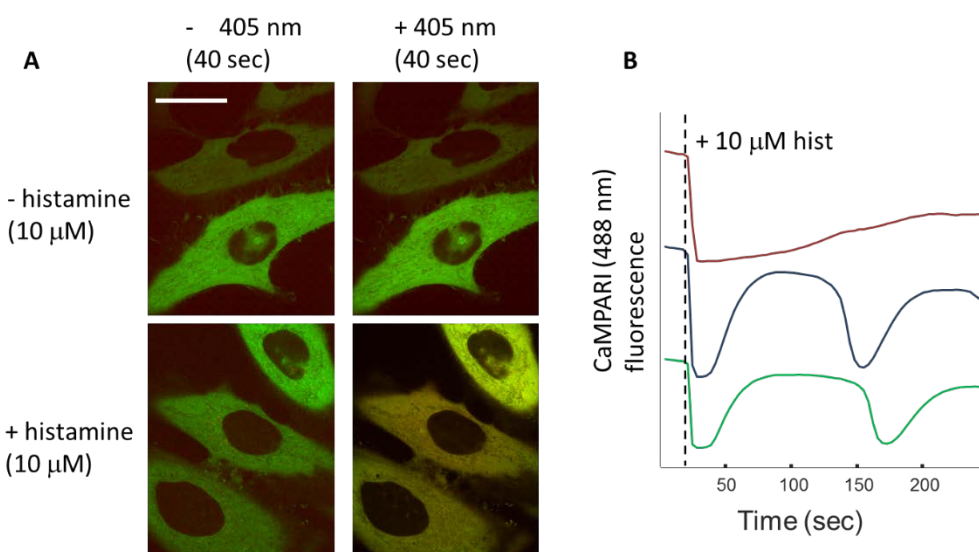

306

307 (A) HeLa cells expressing CaMPARI were fluorescent using a 488 nm excitation with the fluorescence  
308 confined to the cytoplasm (left column). Upon exposure to 40 seconds of 405 nm light, cells treated with  
309 histamine increased fluorescence excited by 561 nm light (bottom), whereas untreated cells remained green  
310 (top). Scale bar is 10  $\mu$ m. (B) CaMPARI can act as a real time calcium indicator. HeLa cells expressing  
311 CaMPARI were imaged with 488 nm light and were stimulated with 100  $\mu$ M histamine. The green  
312 fluorescence decreased indicating increased cytoplasmic calcium, similar to previous reports.

313

314

315

316

317

318

319 **Supplementary Figure 2:**

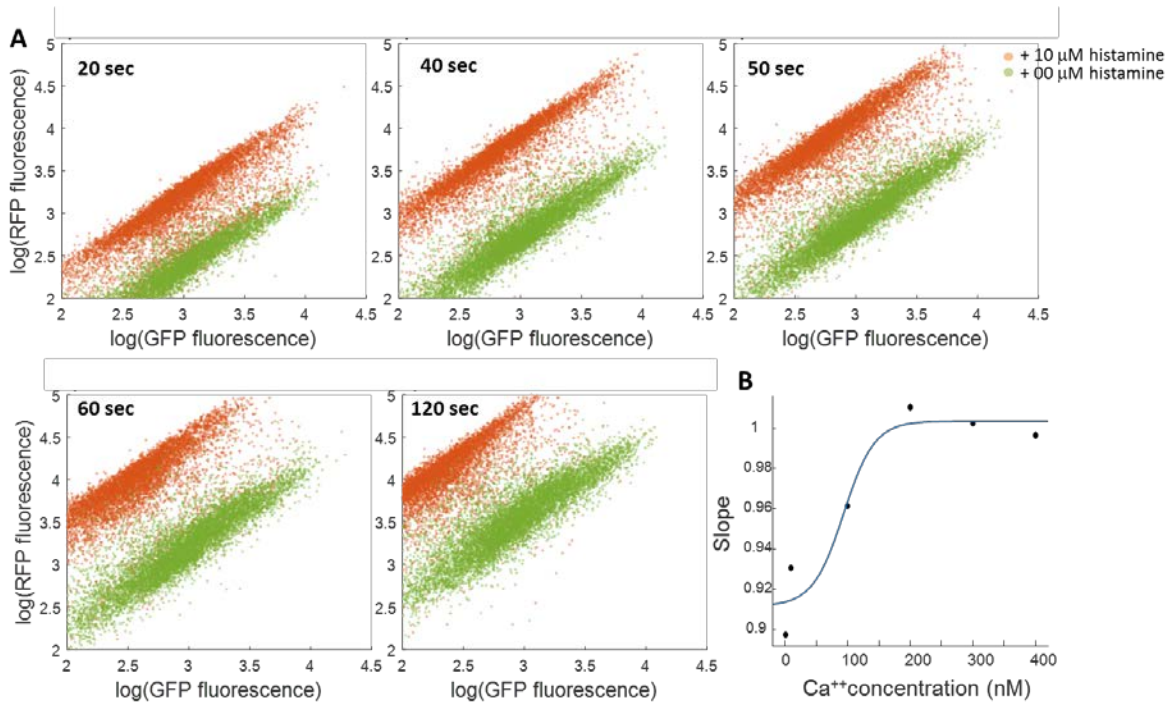

320

321 (A) Cytometry data showing the effect of increased 405 nm exposure time on CaMPARI expressing cells  
322 treated with 0 μM (green) or 10 μM (red) histamine. The largest separation between treated and untreated  
323 populations occurred at 40 seconds, and we used that timing for all additional experiments. (B)  $K_d$   
324 calculations from the ionomycin cytometry data. The slopes of the best fit lines were fit to a hill curve  
325 which yielded a  $K_d = 124$  nM calcium.

326

327

328

329

330

331

332

333

334

335

336

337 **Supplementary Figure 3:**  
338

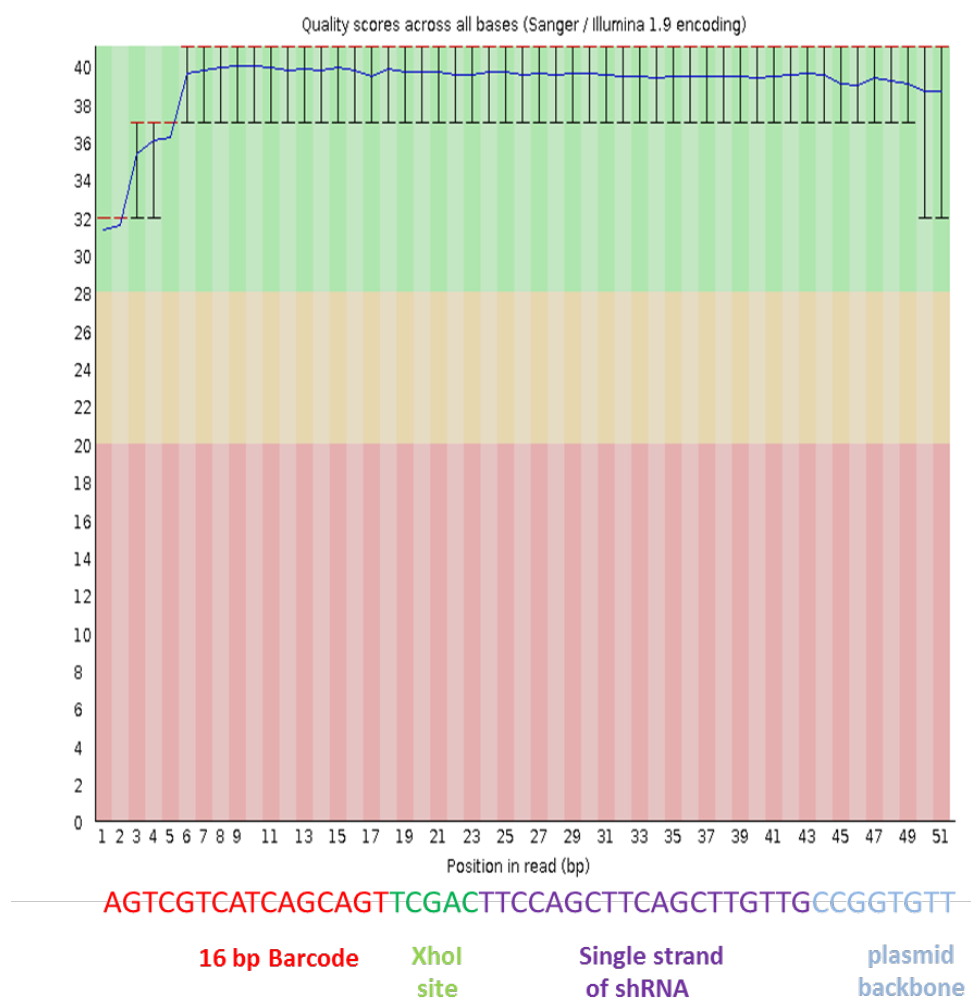

339 Read quality from the NextSeq was high across all positions of the shRNA tag. For each run, we spiked in  
340 20% phiX to increase library diversity. The typical number of reads that matched to sequences in the TRC  
341 library was ~240M.  
342  
343

344  
345  
346  
347  
348  
349  
350  
351  
352  
353  
354  
355



356 **Supplementary Figure 4:**  
357

| Gene     | Function                                          |
|----------|---------------------------------------------------|
| UNC45A   | Protein chaperone                                 |
| UNK      | Zinc finger RNA binding protein                   |
| NTNG2    | Neural patterning                                 |
| ESM1     | Secreted protein in angiogenesis                  |
| PPIF     | Protein Folding                                   |
| RGS8     | Regulator G-protein signaling                     |
| EPHB2    | Ephrin receptor                                   |
| PVRL1    | Organization of cell junctions                    |
| C10orf39 | Microtubule and janus kinase interactions         |
| TACC2    | Microtubule interacting protein                   |
| DGKK     | Diacylglycerol kinase                             |
| DPP10    | Alters voltage gated potassium channel properties |
| C10orf13 | FGF binding protein                               |
| DNM3     | Vesicular transport                               |
| FAM70B   | Transmembrane protein 255                         |
| TMEM2    | Cell surface hyaluronidase                        |
| GALC     | Galactosylceramidase synthesis                    |
| LMAN1L   | Lectin binding protein                            |
| MYH2     | Myosin heavy chain                                |
| FLNA     | Actin binding protein                             |

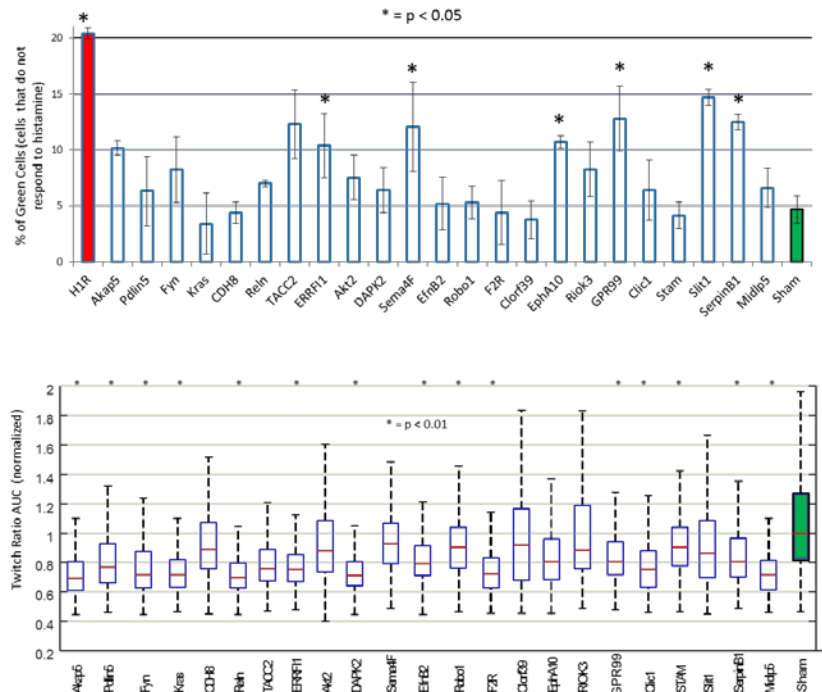

358 (A) List of the top 25 genes enriched in the green population as called by DeSeq analysis. (B) Cytometry  
359 data showing the fraction of green cells as compared to a sham when infected with single clone knockdowns  
360 identified in the enriched sequence. \* represents a p-value < 0.05. (C) Calcium area-under-the-curve  
361 measurements for the top 25 hits using the real time indicator, Twitch2B. Cells were infected with lentivirus  
362 containing the single clone knockdown and imaged during histamine addition. Each bar chart represents 2  
363 biological replicates with > 50 cells per field of view. \* represents a p-value < 0.01.  
364  
365  
366

367  
368  
369  
370  
371  
372  
373  
374  
375  
376  
377  
378  
379  
380  
381  
382  
383  
384



385 **Supplementary Figure 5:**  
386

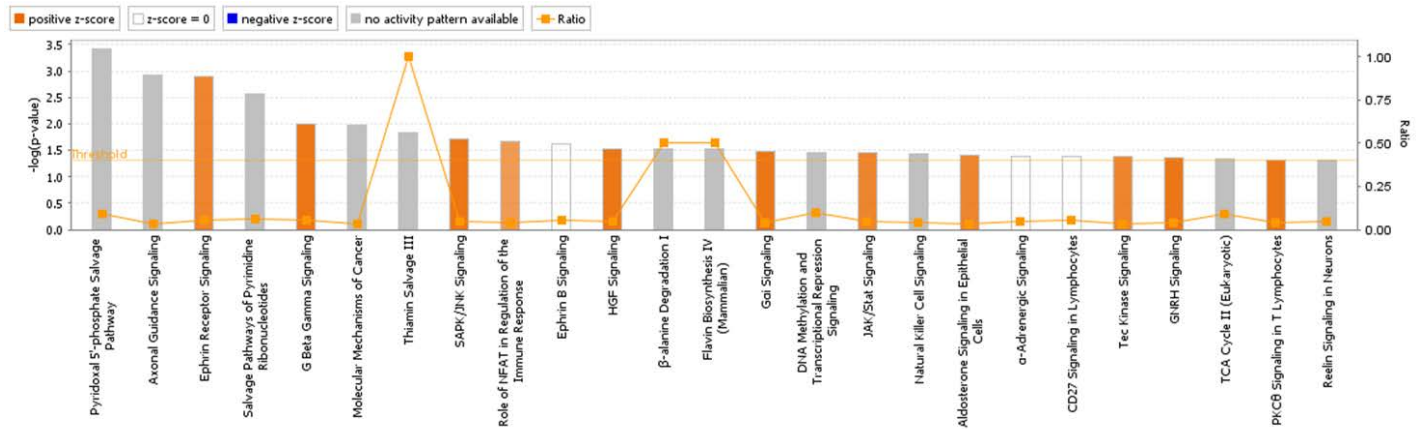

387  
388  
389  
390 The top pathways identified from the DeSeq genes as identified by the Ingenuity Pathway Analysis  
391 software.  
392  
393  
394  
395  
396  
397  
398  
399  
400  
401  
402  
403  
404  
405  
406  
407  
408  
409  
410  
411  
412  
413  
414  
415  
416  
417  
418  
419  
420

421 **Supplementary Figure 6:**  
422

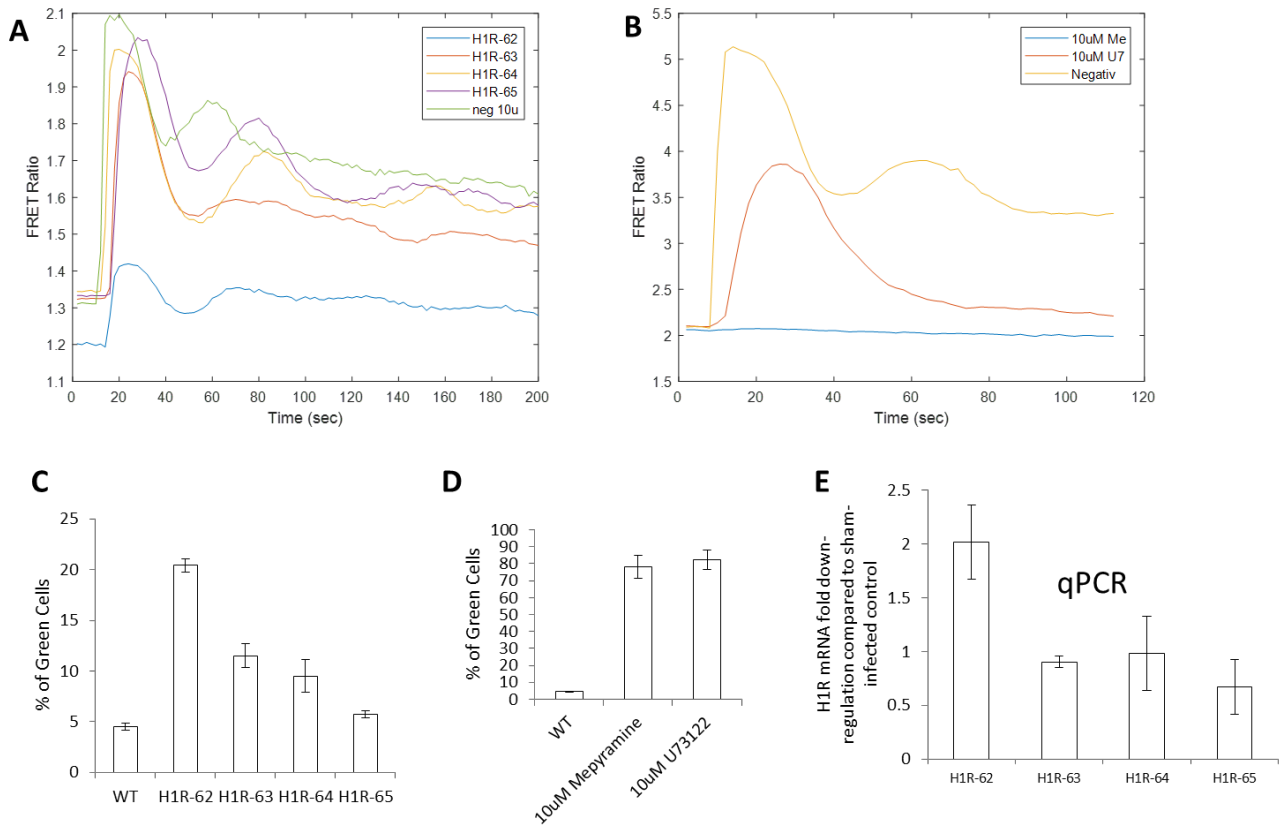

423  
424  
425  
426  
427  
428  
429  
430  
431  
432  
433  
434  
435  
436  
437  
438  
439  
440  
441  
442  
443  
444

Chemical and genetic manipulation of the H1R receptor. (A) The TRC library has 4 shRNA targets against H1R, but only a single strand showed decreased calcium influx compared to a sham negative control as measured with Twitch. (B) Twitch measurements showing the effects of Mepyramine (H1R inhibitor) and U73122 (Phospholipase-C inhibitor). Mepyramine blocks all calcium influx upon histamine addition. (C) Cytometry measurements using CaMPARI of individual shRNA knockdowns. Only H1R-62 had a significantly increased fraction of green cells, however, it did not appear in our hit list. (D) Cytometry measurements of the H1R antagonists Mepyramine and U73122. (E) QPCR data revealed only a 2-fold knockdown of the H1R receptor using the H1R-62 shRNA which may explain why it did not appear in our screen.

445 **Supplementary Figure 7:**

446

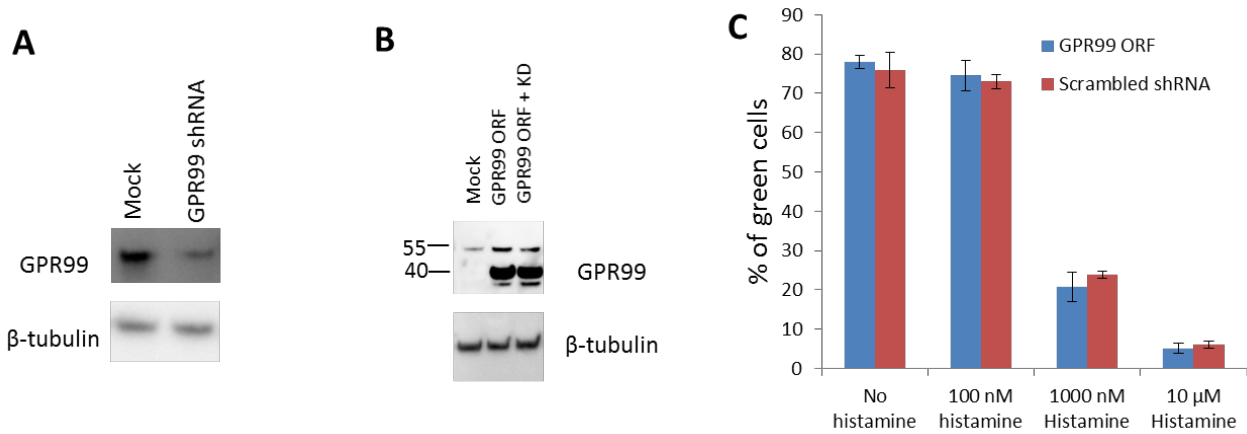

447

448 GPR99 ORF expression does not rescue the phenotype. (A) A western blot showing knockdown in HeLa  
449 cells with the shRNA. (B) Western blot showing the ORF expression. A second dominant band at 40 kD  
450 is visible only in the ORF expression, suggesting there are post-translational modifications on the  
451 endogenous receptor absent from the ORF construct. The shRNA did not reduce ORF expression. (C)  
452 Cytometry measurements showing histamine response of the GPR99 ORF. Overexpression of GPR99 did  
453 not alter the calcium influx from histamine stimulation as compared to a sham shRNA.

454

455

456

457

458

459

460

461

462

463

464

465

466

467

468

469

470

471

472

473

474

475

476

477

478

479

480 **Supplementary Figure 8:**  
481

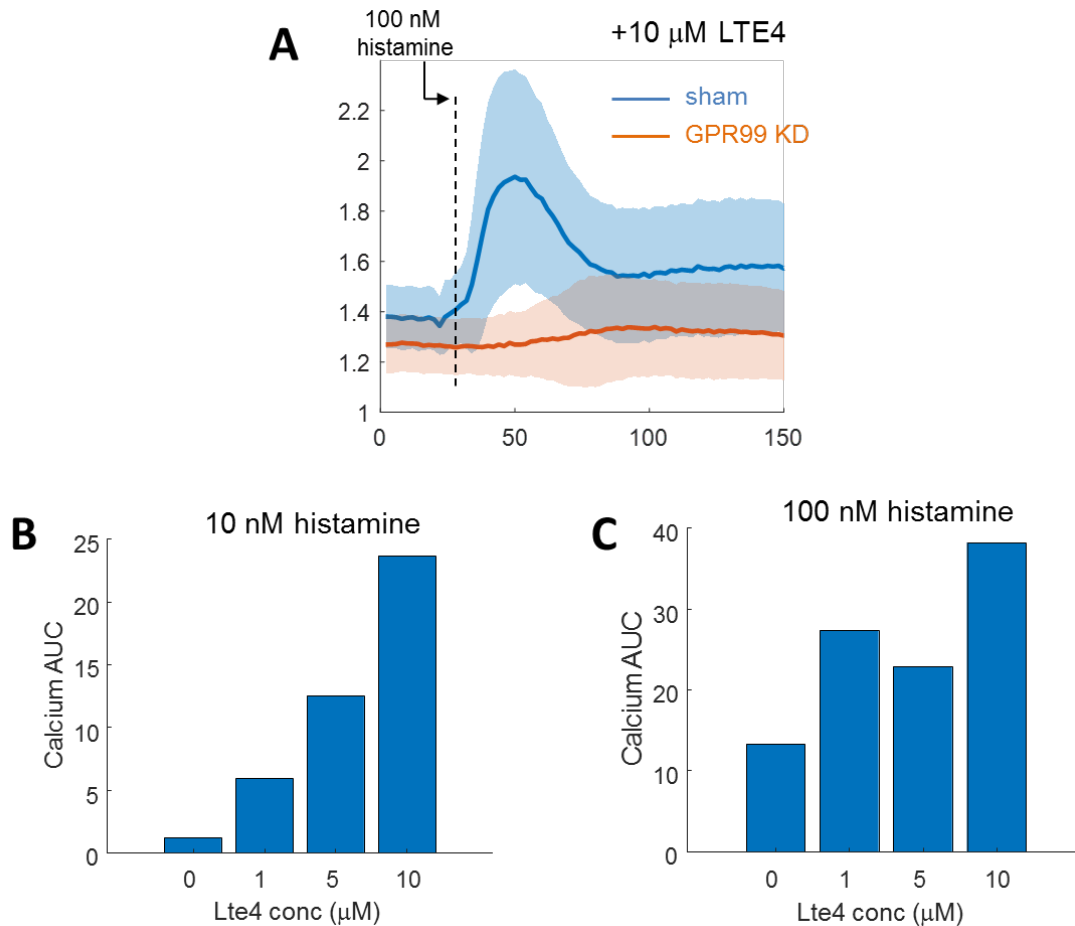

482  
483  
484  
485  
486  
487  
488  
489  
490  
491  
492  
493  
494  
495  
496  
497  
498  
499  
500  
501

Increasing Lte4 concentration increases histamine induced calcium flux dependent on the presence of GPR99. (A) Pre-treatment of HeLa cells with Lte4 caused an increased calcium response in the sham shRNA (blue) but not in a GPR99 knockdown (red). The solid line shows population mean and the shaded area shows the standard deviation. (B and C). Pre-treatment of HeLa cells caused increased calcium responses with addition of 10 nM (B) or 100 nM (C) histamine. Calcium influx was measured with Twitch by taking the AUC of the first 40 seconds after histamine addition.

502 **Supplementary Figure 9:**  
503

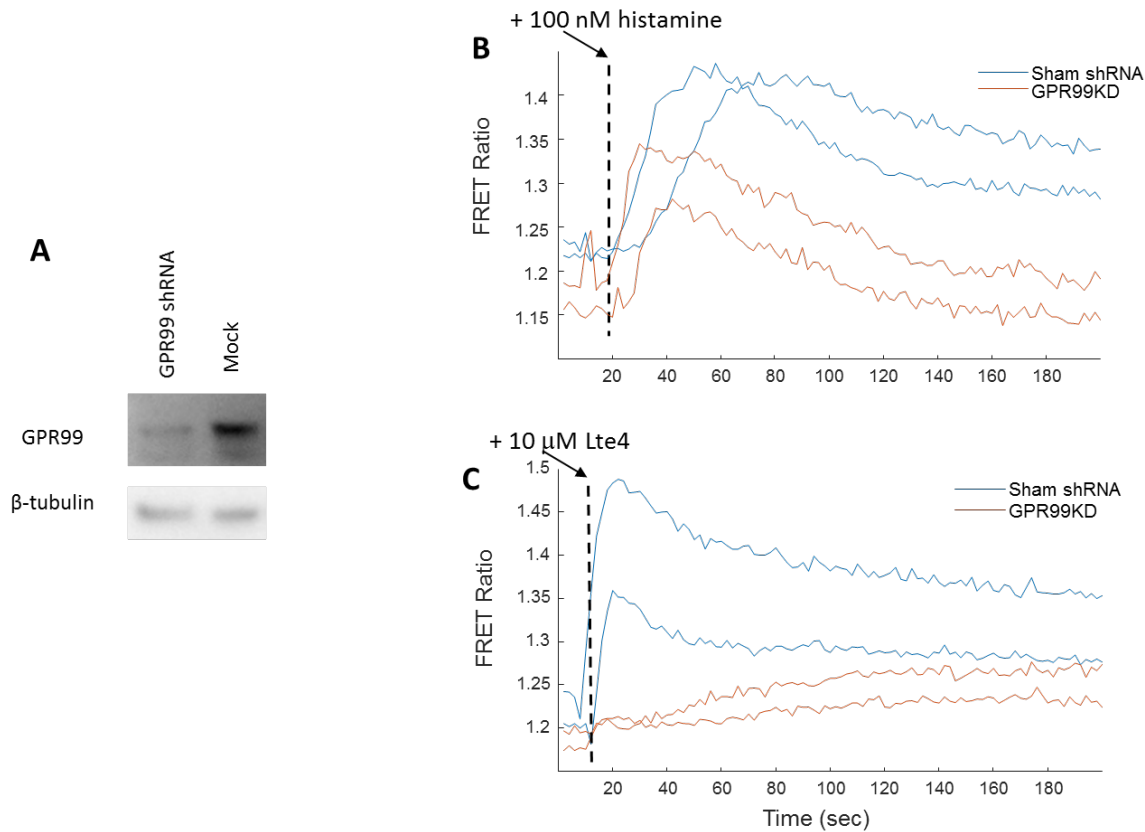

504  
505  
506 Beas2B epithelial cells also have histamine induced calcium influx dependent on GPR99 and Lte4. (A)  
507 Western blot showing a reduction of protein expression in Beas2B cells with the shRNA. (B) Histamine  
508 induced calcium flux as measured by Twitch is decreased in a GPR99 knockdown (red) as compared to a  
509 sham shRNA (blue). Each line represents the population mean of 1 biological replicate (> 60 cells). (C)  
510 Lte4 addition induced increased cytoplasmic calcium in sham (blue) but not GPR99 knockdown (red) cells.

511  
512  
513  
514  
515  
516  
517  
518  
519  
520  
521  
522  
523  
524  
525  
526

527 **Supplementary Figure 10:**

528

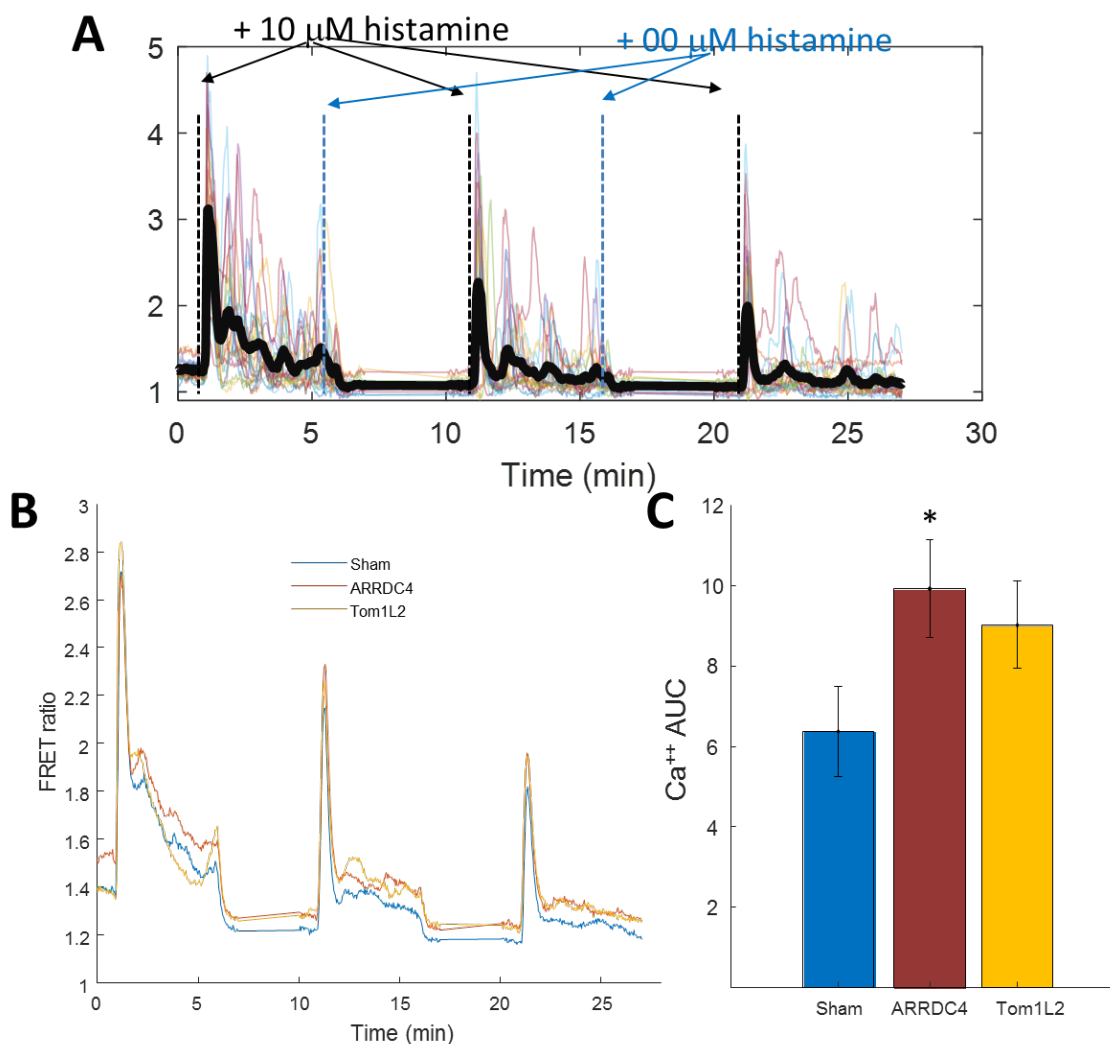

529

530 (A) Histamine induced desensitization protocol. HeLa cells were measured with Twitch upon repeated

531 exposure and washout of 10  $\mu$ M histamine (black and blue dashed lines, respectively). Imaging was paused

532 after the washout to minimize photobleaching. The black line represents the population average. Semi-

533 transparent colored lines represent individual cells to highlight the diversity in dynamics. (B) Average

534 traces of 3 biological replicates showing the desensitization response of a sham (blue), ARRDC4

535 knockdown (red), and Tom1L2 knockdown (yellow). (C) Area under the curve measurements (40 seconds

536 total time) after 2.5 minutes of histamine addition on the third stimulation for sham (blue), ARRDC4

537 knockdown (red), and Tom1L2 knockdown (yellow). \* represents a p-value < 0.05 in a student t-test.

538

539

540

541

542

543

544

545  
546  
547  
548  
549  
550  
551  
552  
553  
554  
555  
556  
557  
558  
559  
560  
561

**Supplementary Figure 11:**

| Gene Name | Function                                             |
|-----------|------------------------------------------------------|
| USP13     | Deubiquitinase                                       |
| MCCEMP1   | Mast cell expressed protein                          |
| NIT2      | Nitrilase                                            |
| FAM116B   | GEF for Rab14, Rab35                                 |
| C14orf68  | Mitochondrial transporter                            |
| TOM1L2    | Endosomal sorting, binds to clathrin                 |
| ZER1      | Ubiquitin ligase                                     |
| XPR1      | Mediates phosphate homeostasis                       |
| ARRDC4    | Arrestin domain containing 4                         |
| GIN52     | DNA helicase                                         |
| KCNJ3     | Inward potassium rectifier, controlled by G-proteins |
| HYPE      | Adenyltransferase - inactivates Rho GTPases          |
| MYT1L     | Neural transcription factor                          |
| AADAACL1  | Cholesterol metabolism                               |
| C14orf140 | Zinc finger C2HC-type                                |
| RBM13     | RNA-binding protein                                  |
| CGB3      | Glycoprotein hormone                                 |
| CADPS     | Calcium dependent secretion activator                |
| BBOX1     | Gamma-Betyrobetaine hydroxylase                      |
| DECR1     | Fatty acid beta-oxidation                            |
| UBE3C     | E3 ubiquitin protein ligase                          |

562  
563  
564

The top 20 genes identified by DeSeq involved in desensitization of histamine signaling.
